# Supplementary material
Source: publisher site journal article supplement (https://www.dovepress.com/article/488340)
Supplement: Supplementary file 1 [file get_supplementary_file.php]

**Supplementary Figures**

**Supplementary Fig. 1. The effect of CASP1 inhibitor (**Belnacasan**) on IL-1β and IL-18 in nasal mucosal epithelial cells after DerP1 stimulation.** (A) The changes of *CASP1* mRNA expression level in HNEpCs in each group using qPCR. (B) The changes of CASP1 protein expression level in HNEpCs in each group using WB. (C) The changes of *IL-1B* mRNA expression level in HNEpCs in each group using qPCR. (D) The changes of IL1β protein expression level in HNEpCs in each group using WB. (E) The changes of *IL-18* mRNA expression level in HNEpCs in each group using qPCR. (F) The changes of IL-18 protein expression level in HNEpCs in each group using WB. Bar value = mean±SEM; n = 3 per group for qPCR and WB. All graphs of qPCR and WB displayed were analyzed using one-way ANOVA (four groups). **P* < 0.05, ***P* < 0.01, ****P* < 0.001, ns, not significant.

**
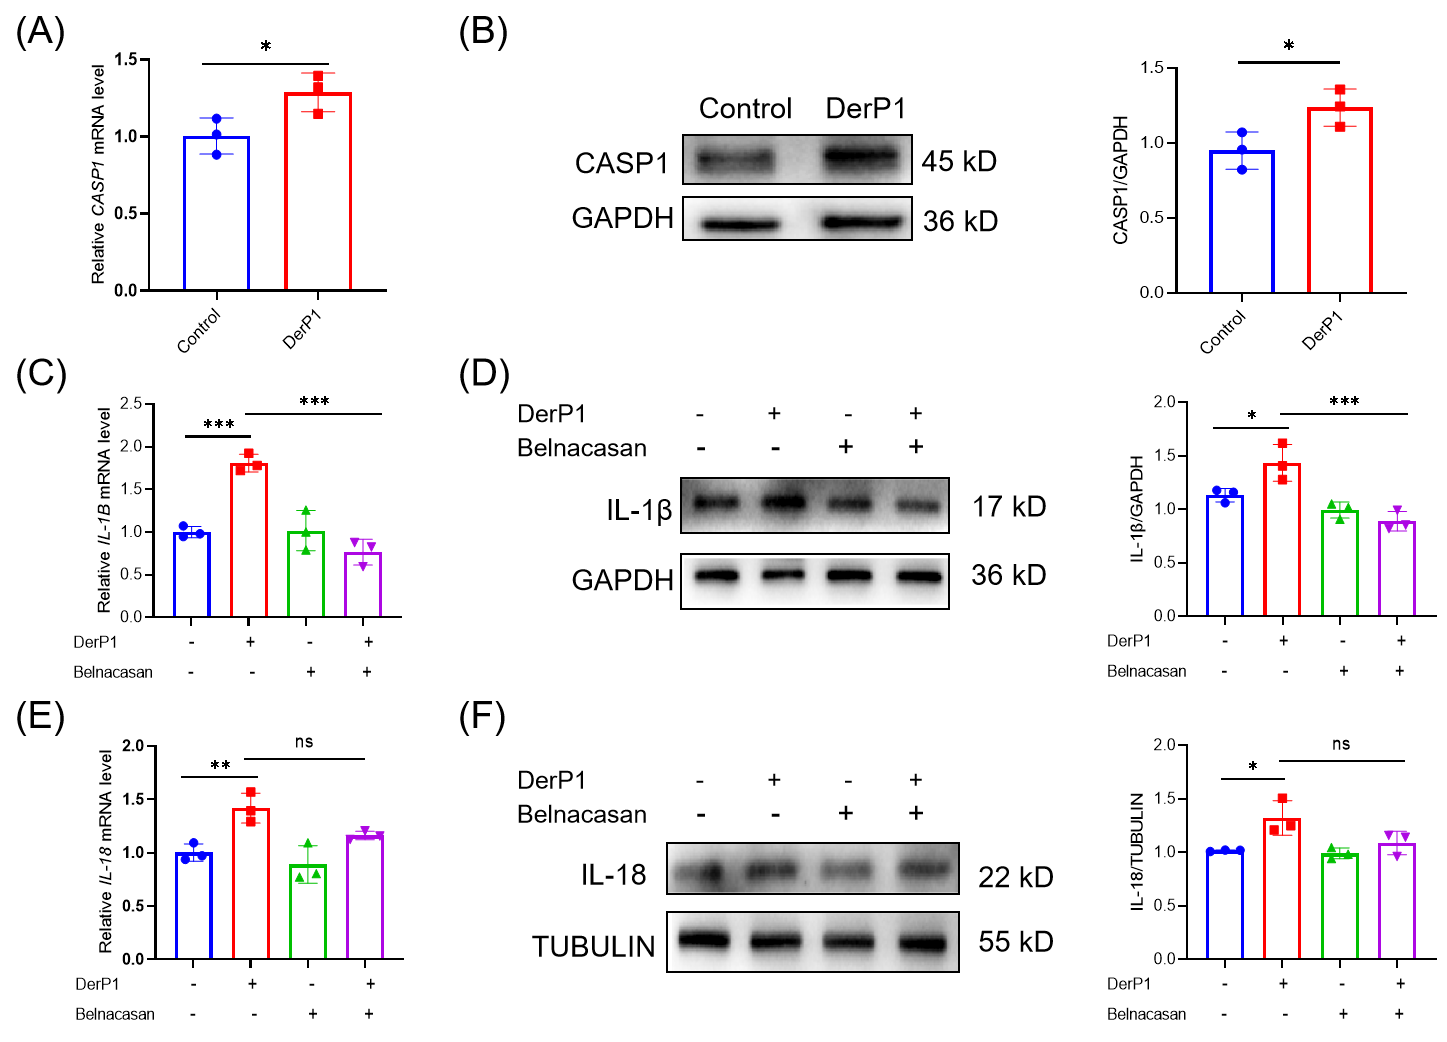
**

**Supplementary Fig. 2. The effect of IL-1β on CD4+T cell-related type 2 cytokines.** (A) Statistical comparison of serum total IL-4 levels between groups using ELISA. (B) Statistical comparison of serum total IL-5 levels between groups using ELISA. (C) Statistical comparison of serum total IL-13 levels between groups using ELISA. Bar value = mean±SEM; n = 4 per group for ELISA. All graphs were analyzed using one-way ANOVA (four groups). **P* < 0.05, ****P* < 0.001.

**
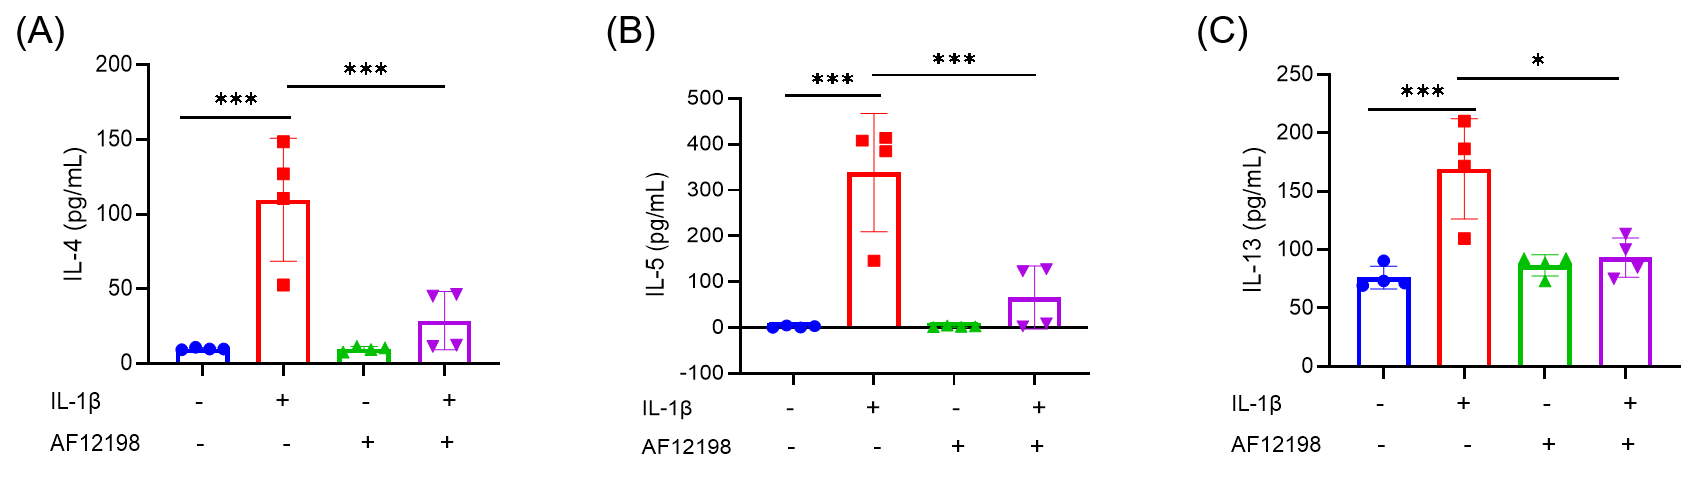
**
